# Supplementary material for: Deregulation of Astroglial TASK-1 K+ Channel Decreases the Responsiveness to Perampanel-Induced AMPA Receptor Inhibition in Chronic Epilepsy Rats
Source: MDPI journal article supplement (doi:10.3390/ijms24065491), 2023-03-13
Supplement: s1 [file s1]

**Supplementary Information**

**Deregulation of astroglial TASK-1 K<sup>+</sup> channel decreases the responsiveness to perampanel-induced AMPA receptor inhibition in chronic epilepsy rats**

**Duk-Shin Lee<sup>1,2</sup>, Tae-Hyun Kim<sup>1,2</sup>, Hana Park<sup>1,2</sup> and Tae-Cheon Kang<sup>1,2\*</sup>**

<sup>1</sup>Department of Anatomy and Neurobiology, Institute of Epilepsy Research, College of Medicine, Hallym University, Chuncheon 24252, Republic of Korea

\* Correspondence to: T. -C. Kang, Department of Anatomy and Neurobiology, College of Medicine, Hallym University, Chuncheon, Kangwon-Do 24252, Republic of Korea; Tel: +82-33-248-2524; Fax: +82-33-248-2525; E-mail: tckang@hallym.ac.kr

**Fig. 4C**

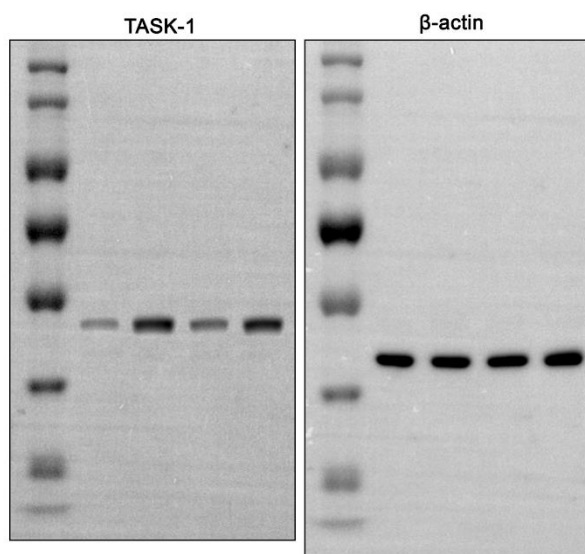

**Fig. 6C**

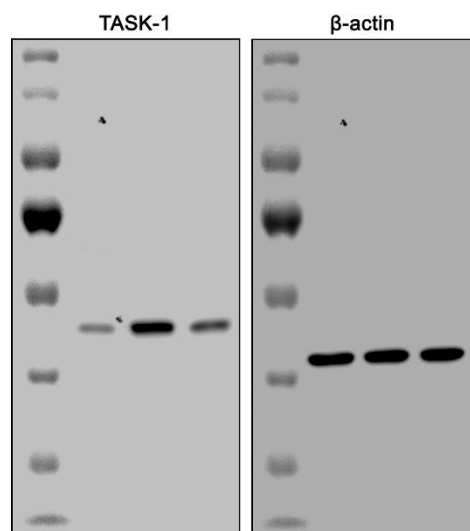

**Fig. 8C**

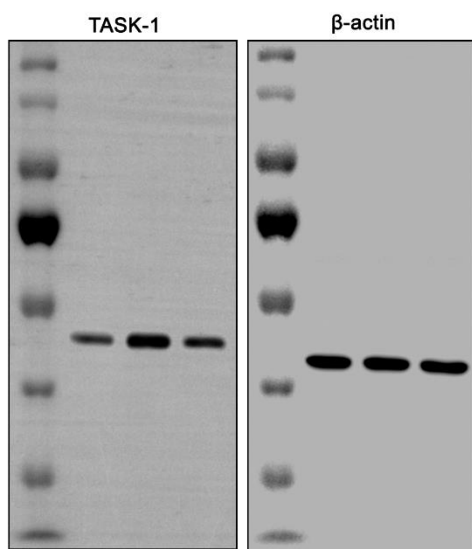

**Supplementary Figure S1. Full-gel images of the Western blot data in Figs 4C, 6C and 8C.**
